# Supplementary material for: C-terminal truncation modulates α-Synuclein’s cytotoxicity and aggregation by promoting the interactions with membrane and chaperone
Source: PubMed Central journal article supplement (PMC9363494; doi:10.1038/s42003-022-03768-0), 2022-08-09
Supplement: 42003_2022_3768_MOESM3_ESM.pdf [file 42003_2022_3768_MOESM3_ESM.pdf]

## Description of Additional Supplementary Files

**File name:** Supplementary Data 1

**Description:** Source data Fig. 1

**File name:** Supplementary Data 2

**Description:** Source data Fig. 2

**File name:** Supplementary Data 3

**Description:** Source data Fig. 4
